1 Direct contribution of skeletal muscle mesenchymal progenitors  
2 to bone repair

3

4 Julien Anais<sup>1</sup>, Kanagalingam Anuya<sup>1</sup>, Megret Jérôme<sup>2</sup>, Luka Marine<sup>3</sup>, Ménager Mickaël<sup>3</sup>, Relaix  
5 Frédéric<sup>1</sup> and Colnot Céline<sup>1\*</sup>

6

7 <sup>1</sup> Univ Paris Est Creteil, INSERM, IMRB, F-94010, Creteil, France

8 <sup>2</sup> Cytometry core facility, Structure Fédérative de Recherche Necker INSERM US24/CNRS UMS3633,  
9 Paris, France

10 <sup>3</sup> Laboratory of Inflammatory Responses and Transcriptomic Networks in Diseases, Université de Paris,  
11 *Imagine* Institute, INSERM UMR 1163, F-75015, Paris, France

12 \*Correspondence: [celine.colnot@inserm.fr](mailto:celine.colnot@inserm.fr)

13

14

15 **Abstract**

16 Tissue regeneration relies on the activation of tissue resident stem cells concomitant with a transient  
17 fibrous tissue deposition to allow functional tissue recovery. Bone regeneration involves skeletal  
18 stem/progenitors from periosteum and bone marrow, the formation of a fibrous callus followed by the  
19 deposition of cartilage and bone to consolidate the fracture. Here, we show that mesenchymal  
20 progenitors residing in skeletal muscle adjacent to the bone fracture play a crucial role in mediating the  
21 initial fibrotic response to bone injury and also participate in cartilage and bone formation in the  
22 fracture callus. Combined lineage and scRNAseq analyses reveal that skeletal muscle mesenchymal  
23 progenitors adopt a fibrogenic fate before they engage in a chondrogenic fate after fracture. In  
24 polytrauma, where bone and skeletal muscle are injured, skeletal muscle mesenchymal progenitors fail  
25 to undergo fibrogenesis and chondrogenesis. This leads to impaired healing and persistent callus  
26 fibrosis originating from skeletal muscle. Thus, essential bone-muscle interactions govern bone  
27 regeneration through the direct contribution of skeletal muscle as a source of mesenchymal progenitors  
28 driving the fibrotic response and fibrotic remodeling, and supporting cartilage and bone formation.

29

## 30 **Introduction**

31 Bone regeneration is usually described as a scarless and efficient regenerative process, beginning with  
32 an inflammatory response, the formation of a fibrous callus and the deposition of cartilage and bone  
33 tissues that are then slowly remodeled to reconstitute the initial shape and function of the injured bone.  
34 Skeletal/stem progenitors activated by the bone injury differentiate into chondrocytes preferentially in  
35 the center of the callus where endochondral ossification occurs, and the replacement of cartilage by  
36 bone is essential for successful healing. At the periphery of the callus where bone formation occurs via  
37 intramembranous ossification, skeletal/stem progenitors differentiate directly into osteoblasts. Several  
38 sources of skeletal stem/progenitors for bone repair have been identified including the bone marrow  
39 and the periosteum lying at the outer surface of bone <sup>1-5</sup>. Other reports have pointed at the contribution  
40 of surrounding tissues such as skeletal muscle but the nature of the skeletal stem/progenitors from  
41 skeletal muscle and their role in bone regeneration remain undefined <sup>6-9</sup>. The presence of bone forming  
42 cells in skeletal muscle has been suspected since Urist first showed that bone formation could be  
43 induced within skeletal muscle <sup>10</sup>. The role of the myogenic lineage in bone repair has been previously  
44 investigated and revealed that the muscle stem cells, or satellite cells, were required for normal bone  
45 repair through their paracrine functions <sup>6</sup>. Although satellite cells can differentiate into osteoblasts and  
46 chondrocytes *in vitro*, *in vivo* investigations suggested a poor osteochondrogenic potential of the  
47 myogenic lineage during bone repair <sup>6,9,11</sup>. Here, we sought to explore other cell populations within the  
48 skeletal muscle interstitium, containing fibro/adipo progenitors (FAP) and mesenchymal progenitors  
49 (MP). These cell populations from the skeletal muscle interstitium are known to support skeletal  
50 muscle regeneration and become the source of persistent adipose and fibrotic tissue in pathological  
51 conditions such as muscular dystrophy <sup>12-16</sup>. We characterized the skeletal muscle mesenchymal  
52 progenitors participating in cartilage and bone formation during bone repair and investigated their  
53 function in the context of musculoskeletal trauma. The role of intact skeletal muscle around bone is  
54 recognized clinically to be essential for bone repair as soft tissue damage can severely impair bone  
55 healing and skeletal muscle coverage can improve healing, but the underlying mechanisms are still  
56 unknown <sup>17-20</sup>. Using a mouse polytrauma model and single-cell RNA-seq analyses of skeletal muscle  
57 mesenchymal progenitors, we uncover that the initial fibrotic response mediated by skeletal muscle  
58 mesenchymal progenitors and their commitment to the chondrogenic lineage in the fracture callus are

59    impaired. Further, in the polytrauma environment skeletal muscle surrounding the bone fracture site is

60    the source of persistent callus fibrosis compromising bone repair.

61

## 62 **Results**

### 63 **Skeletal muscle contains a heterogeneous population of mesenchymal progenitors participating** 64 **in bone repair**

65 To elucidate the tissue origin of skeletal stem/progenitors cells, we co-transplanted Tomato-labelled  
66 EDL muscle (*Extensor Digitus Lengus*) and GFP-labelled periosteum grafts at the tibial fracture site of  
67 wild-type hosts. We observed concomitant recruitment of skeletal muscle and periosteal cells in  
68 cartilage and bone within the callus (Fig. 1a). We showed that the cellular contribution of skeletal  
69 muscle was physiological, by transplanting EDL muscle from *GFP-actin* mice adjacent to the tibia of a  
70 wild-type host and allowing complete regeneration of the transplanted EDL muscle for one month.  
71 Tibial fracture induced one-month post-EDL transplantation revealed similar contribution of skeletal  
72 muscle derived cells to cartilage and bone within the fracture callus (Fig. 1b).

73 To characterize the cartilage and bone forming cells derived from skeletal muscle, we induced a  
74 fracture in *Pax7<sup>CreERT2</sup>;Rosa<sup>mTmG</sup>* mice or transplanted EDL-skeletal muscle grafts from  
75 *Pax7<sup>CreERT2</sup>;Rosa<sup>mTmG</sup>* mice at the fracture site of wild-type hosts. Tomato-positive cells were detected  
76 within callus but no GFP-positive cells, demonstrating the absence of contribution from the myogenic  
77 lineage (Extended Data Fig. 1a, b). All skeletal stem/progenitors forming cartilage and bone in the  
78 fracture callus are derived from the Prx1 mesenchymal lineage that marks bone marrow stromal/stem  
79 cells and periosteal cells<sup>3</sup>. Transplantation of EDL grafts from *Prx1<sup>Cre</sup>;Rosa<sup>mTmG</sup>* donors showed that  
80 transplanted skeletal muscle also contains osteochondroprogenitors for bone repair strictly derived  
81 from the Prx1 mesenchymal lineage. These osteochondroprogenitors started migrating at the center of  
82 the callus from skeletal muscle adjacent to bone between days 5 and 7 post-fracture and were detected  
83 within cartilage by day 7 and within bone until day 28 (Fig. 1c). To confirm the presence of  
84 osteochondroprogenitors within skeletal muscle, we showed that mononucleated cells isolated from  
85 *Prx1<sup>Cre</sup>;Rosa<sup>mTmG</sup>* hindlimb muscles free of fascia, tendon and fat, and transplanted in wild-type host,  
86 were able to integrate into callus cartilage and bone (Extended Data Fig. 1c). At steady state, on  
87 transverse sections of *Prx1<sup>Cre</sup>;Rosa<sup>mTmG</sup>* TA muscle, the Prx1-derived GFP-labelled cells localized in  
88 the skeletal muscle interstitium next to capillaries, co-expressed the pericyte markers, NG2 and  
89 PDGFR $\beta$ , and the mesenchymal markers, PDGFR $\alpha$  and CD29 (Fig. 2a). To better understand the  
90 cellular composition of the skeletal muscle mesenchymal progenitor population, we performed scRNA-  
91 seq analysis of sorted Prx1-derived skeletal muscle cells surrounding the tibia. We identified 9 clusters

92 and defined four sub-populations, distinct from endothelial and hematopoietic cell populations, and  
93 including FAP/MP (expressing *Prrx1*, *Cxcl12*, *Pdgfra*, *Ly6a* and *Cd34*), tenocyte-like cells (expressing  
94 *Scx*, *Tnmd* and *Kera*), pericytes (expressing *Cspg4*, *Des* and *Mylk*) and *Spp1*/*Lgals3*<sup>+</sup> cells (Figure  
95 1b-e and Extended Data Fig. 2a). Additionally, flow cytometry analyses showed that freshly isolated  
96 Prx1-derived skeletal muscle cells represent 33,5% of mononucleated cells within muscle, are CD45-  
97 CD11b-CD31- and coincide with populations expressing the pericyte/mesenchymal marker PDGFR $\beta$ ,  
98 the fibroadipoprogenitor/mesenchymal progenitor (FAP/MP) markers CD29, PDGFR $\alpha$ , Sca1 and  
99 CD34, but do not encompass all mesenchymal cell types within skeletal muscle (Extended Data Fig.  
100 2b-d). Cultured GFP<sup>+</sup> Prx1-derived skeletal muscle cells exhibited osteogenic, adipogenic,  
101 chondrogenic and fibrogenic potential but no myogenic potential and expressed fibro-mesenchymal,  
102 pericyte and tenocyte markers (Extended Data Fig. 2e, f). Skeletal muscle thus contains a  
103 heterogeneous population of skeletal muscle mesenchymal progenitors derived from Prx1  
104 mesenchymal lineage and contributing to bone repair.

105

#### 106 **Skeletal muscle mesenchymal progenitors undergo fibrogenesis before chondrogenesis in** 107 **response to bone fracture**

108 We then characterized the cellular response of skeletal muscle mesenchymal progenitors to bone  
109 fracture. Skeletal muscle surrounding the fracture site was dissected, excluding periosteum and bone  
110 marrow tissues. After enzymatic digestion, we sorted Prx1-derived GFP<sup>+</sup> cells and performed scRNA-  
111 seq analysis combining d0 (un-injured), d3 and d5 post-fracture samples in a common dataset (Figure  
112 2F). We identified 13 clusters in skeletal muscle mesenchymal progenitors that can be partitioned into  
113 4 distinct populations (FAP/MP, tenocyte-like cells, pericytes, and *Spp1*/*Lgals3* cells) already defined  
114 in un-injured skeletal muscle and a distinct fibroblast cluster (Fig. 2f-g, Extended Data Fig. 3a, b).  
115 This fibroblast cluster was defined as cells expressing genes coding for ECM proteins (*Colla1*, *Sparc*,  
116 *Col3a1*, *Col5a1* and *Postn*) but no other subpopulation markers (Extended Data Fig. 3c). To assess the  
117 fate of skeletal muscle mesenchymal progenitors in response to fracture, we annotated the dataset  
118 according to known lineage markers: mesenchymal (MP), fibrogenic (ECM producing cells),  
119 chondrogenic and osteogenic (Table1). Mesenchymal and fibrogenic lineage markers were expressed  
120 mostly by FAP/MP at d0, d3 and d5 while chondrogenic lineage markers were only expressed at d5.  
121 Osteogenic lineage markers were expressed at low level in skeletal muscle mesenchymal progenitors at

122 d3 and d5 (Fig. 2h, i and Extended Data Fig. 2d). *In silico* trajectory analysis on d5 post-fracture  
123 sample showed that skeletal muscle mesenchymal progenitors express mesenchymal lineage markers  
124 and start expressing fibrogenic lineage markers in response to fracture prior to chondrogenic markers,  
125 except for Sox9 which is already detected in the fibrogenic state (Fig. 2j, k). These results indicate that  
126 skeletal muscle mesenchymal progenitors upon activation engage in a fibrogenic fate before  
127 undergoing early chondrogenic differentiation from d5 post-fracture. This cellular response to injury  
128 occurs specifically within the FAP/MP population of skeletal muscle mesenchymal progenitors.

129

### 130 **Musculoskeletal trauma impairs bone healing**

131 To determine the role of skeletal muscle mesenchymal progenitors in musculoskeletal trauma, where  
132 concomitant injury of bone and muscle compromises skeletal regeneration, we developed a clinically  
133 relevant polytrauma mouse model. As observed in human, mechanical injury to skeletal muscles  
134 surrounding a fractured tibia caused fracture non-union, displayed by (i) delayed in callus, cartilage and  
135 bone formation by day 7, (ii) impaired cartilage and bone resorption, (iii) abnormal fibrous tissue  
136 accumulation, and (iv) absence of bone bridging through day 56 (Fig. 3a, b and Extended Data Fig. 4a).  
137 This fracture non-union phenotype was correlated with decreased contribution to cartilage of skeletal  
138 muscle cells (Fig. 3c, d). The mechanical injury to skeletal muscle alone led to heterogeneous and  
139 delayed muscle regeneration as shown by areas containing regenerating muscle fibers and areas  
140 containing fibrous tissue at days 14 and 30 post-injury (Extended Data Fig. 4b). Bone healing was not  
141 impaired when combined with TA muscle injury only, thus a threshold of soft tissue trauma exists  
142 above which bone healing cannot occur efficiently (Extended Data Fig. 4c).

143

### 144 **Musculoskeletal trauma alters early fibrotic response of skeletal muscle mesenchymal** 145 **progenitors to fracture**

146 To understand how polytraumatic injury impacts skeletal muscle mesenchymal progenitors activation  
147 and differentiation, we performed scRNAseq analyses of skeletal muscle mesenchymal progenitors  
148 after fracture or polytrauma (Fig. 4a). Analysis of combined d0, d3 post-fracture, d5 post-fracture, d3  
149 post-polytrauma and d5 post-poly-trauma samples showed that d0 sample was distinct to others  
150 samples. Samples from d3 post-fracture and d3 post-polytrauma clustered together separately from d5  
151 post-fracture and d5 post-polytrauma samples that also clustered together (Fig. 4b left). Combined

152 analysis of the 5 experimental groups uncovered 17 clusters highlighting 6 populations: FAP/MP,  
153 fibroblasts, tenocyte-like cells, pericytes, Spp1+/Lgals3+ cells and chondrocytes. Chondrocytes were  
154 defined as cells expressing *Col2a1*, *Acan* and *Fgfr3* (Fig. 4b right, c and Extended Data Fig. 5a, b).  
155 Analysis of cell cycle showed no difference in cell proliferation between fracture and polytrauma (Fig.  
156 4d and Extended Data Fig. 5c). We then determined whether polytrauma has an impact on the capacity  
157 of skeletal muscle mesenchymal progenitors to engage into fibrogenic and chondrogenic fate compared  
158 to fracture. Analyses of mesenchymal and fibrogenic marker expression suggested a delay in down-  
159 regulation of mesenchymal markers at d3 post-polytrauma, correlated with a delay in up-regulation of  
160 fibrogenic markers at d3 and d5 post-polytrauma. In polytrauma, the chondrogenic markers were not  
161 expressed at d5 compared to fracture (Fig. 4e). We further focused gene ontology (GO) analysis on  
162 non-proliferative clusters 2 and 3 for d3 analysis and cluster 8 for d5 analysis, according to the  
163 percentage of cells from each sample per cluster and the cell cycle state (Fig. 4d, f). We used  
164 differentially expressed genes between clusters 3 (composed of d3 post-fracture cells) and 2 (composed  
165 on d3 post-polytrauma cells), and between post-fracture and post-polytrauma cells within cluster 8 to  
166 run GO analysis. In response to fracture at d3, cells have a high metabolic activity and secrete ECM. In  
167 response to polytrauma, cells express markers of angiogenesis, hypoxia and immune response but  
168 exhibit a lower metabolic activity and are not secreting ECM (Fig. 4g). At d5 post-fracture, cells  
169 expressed high level of ECM genes, genes from TGF $\beta$  pathway and signalling pathways linked with  
170 chondrogenic differentiation (Table2). These changes were not observed in d5 post-polytrauma. Instead  
171 cells exhibited higher level of metabolic activity suggesting a delay in their activation post-injury (Fig.  
172 4h). These results show that the fibrogenic engagement of skeletal muscle mesenchymal progenitors is  
173 a crucial step during bone repair and precedes chondrogenic differentiation. In polytrauma, skeletal  
174 muscle injury perturbs the commitment toward the fibrogenic fate and delays the chondrogenic  
175 differentiation of skeletal muscle mesenchymal progenitors.

176

### 177 **Skeletal muscle is the source of persistent callus fibrosis in traumatic injuries**

178 We then analyzed the consequences of polytrauma at later stages of repair. As observed by scRNAseq  
179 analysis, the expansion of GFP+ skeletal muscle mesenchymal progenitors can be detected on tissue  
180 sections at d3 post-fracture and polytrauma. By day 21 post-injury, skeletal muscle mesenchymal  
181 progenitors were increased around the fracture callus in polytrauma compared to fracture, coinciding



182 with the abnormal accumulation of fibrotic tissue within the callus (Fig. 5a). Prx1 mesenchymal  
183 lineage gives rise to callus fibrosis that express the fibrotic markers Periostin and PDGFR $\alpha$  (Fig. 5b, c).  
184 Moreover, EDL and periosteum grafting showed that skeletal muscle mesenchymal progenitors  
185 produce bone and fibrous tissue in the callus, while periosteal cells only form bone by day 21 (Fig. 5d).  
186 To attenuate fibrosis, we treated mice with the clinically approved pan-tyrosine kinase inhibitor  
187 Imatinib<sup>®</sup> that inhibits receptor phosphorylation including PDGFR $\alpha$ <sup>21,22</sup>. Imatinib<sup>®</sup> treatment had no  
188 effect on bone repair after polytrauma by day 7. However, bone repair was improved as shown by  
189 decreased cartilage, bone and fibrosis volumes as compared to control by day 21 (Fig. 5e). Skeletal  
190 muscle surrounding the fracture site is therefore the origin of callus fibrosis and can be targeted  
191 pharmacologically to improve bone repair after musculoskeletal trauma.  
192

193 **Discussion**

194 In this study, we uncover that skeletal regeneration implicates skeletal stem/progenitor cells from  
195 multiple tissue origins cooperating to repair bone. These skeletal stem/progenitor cells reside not only  
196 in bone (bone marrow, periosteum) but also in adjacent skeletal muscle and are all derived from a  
197 common Prx1-derived mesenchymal lineage. Previous work supported that cellular contribution of  
198 skeletal muscle to bone repair was restricted to specific conditions such as periosteal stripping and that  
199 non-skeletal mesenchymal stromal cells lacked chondro-osteogenic properties<sup>9, 12, 23</sup>. Our results  
200 exclude the endogenous cellular contribution of the myogenic lineage during bone repair *in vivo* and  
201 demonstrate the direct contribution of skeletal muscle mesenchymal progenitors to cartilage and bone  
202 during bone repair. The skeletal muscle mesenchymal progenitors localize within skeletal muscle  
203 interstitium and overlap with FAP/MP population, highlighting new functions of FAP/MP as a  
204 heterogeneous and plastic population, which adapts its fate according to the environment<sup>12, 24, 25</sup>. Using  
205 scRNA-seq analysis, we show that within skeletal muscle mesenchymal progenitors, the FAP/MP  
206 population is distinct from pericytes, tenocyte-like and Spp1+/Lgals3+ populations and is the most  
207 responsive to bone injury. After fracture, we show that excepting Spp1/Lgals3+ population, FAP/MP,  
208 tenocyte-like cells, pericytes and fibroblasts adopt a fibrogenic state within 3 days post-injury  
209 associated with marked up-regulation of ECM genes. During this transient fibrogenic state, skeletal  
210 muscle mesenchymal progenitors express the master regulator of chondrogenesis Sox9 but are not  
211 engaged into a chondrogenic fate until day 5 post-fracture. Interestingly, lineage tracing showed that  
212 skeletal muscle mesenchymal progenitors are recruited at the fracture site between day 5 and day 7,  
213 indicating that they are already committed to chondrogenesis within muscle tissue before migrating at  
214 the center of the callus. Although skeletal muscle mesenchymal progenitors exhibit osteogenic  
215 potential *in vitro*, they preferentially engage in the chondrogenic lineage *in vivo* to support  
216 endochondral ossification.

217 In a polytrauma environment, the activation of skeletal muscle mesenchymal progenitors into the  
218 transient fibrogenic state is impaired and cells fail to undergo chondrogenesis. At later stages of repair,  
219 damaged skeletal muscle adjacent to the bone fracture is responsible for fibrous tissue accumulation  
220 within the fracture callus, interfering with fracture consolidation. Skeletal muscle surrounding bone thus  
221 drives the fibrotic response and fibrotic remodelling during bone repair. Fibrosis is a dynamic process  
222 common to many tissue regeneration processes beginning with an initial phase of fibrotic response

223 required for resident stem/progenitor cell activation and followed by active fibrotic remodelling  
224 necessary for completion of tissue regeneration <sup>26, 27</sup>. In other regenerative processes, fibrotic  
225 progenitors are distinct from tissue-specific stem/progenitors and reside within the tissues themselves  
226 <sup>14, 28-30</sup>. In bone regeneration, we showed that fibrotic progenitors are recruited from adjacent skeletal  
227 muscle after polytrauma and are derived from the same pool of progenitors that will undergo  
228 chondrogenesis. Several molecular therapies have been developed to treat fibrosis. Imatinib<sup>®</sup>, a pan-  
229 inhibitor of PDGFR, Bcr-abl and c-kit signalling pathways, ameliorates the late stages of bone repair in  
230 our polytrauma model suggesting potential applications of Imatinib<sup>®</sup> or other related drugs in  
231 orthopaedics. Overall our findings have wide implications in musculoskeletal health, as they bring new  
232 knowledge on the role muscle plays during bone repair and define skeletal muscle mesenchymal  
233 progenitors as a prime target to enhance bone repair and prevents pathological fibrosis.

234

235 **Acknowledgements**

236

237 We thank M. Garfa-Traoré, N. Goudin, C. Cordier, O. Duchamp de Lageneste, S. Alonso-Martin, B.

238 Drayton, C. Masson for advice and/or technical assistance. **Funding:** This work was supported by

239 INSERM ATIP-Avenir to C.C. and M.M, Fondation de l'Avenir to C.C., ANR-13-BSV1-001 to C.C.

240 and F.R. and NIAMS R01 AR057344 and R01 AR072707 to C.C. and T. Miclau. A.J. was supported

241 by a PhD fellowship from Paris Descartes University.

242

243 **Author contributions**

244 A.J. performed the experiments with the help of A.K.. J.M. assisted with flow cytometry analyses.

245 M.L. performed scRNAseq libraries. M.M. and F.R. reviewed the manuscript and gave advices. A.J.

246 and C.C. designed the experiments, analyzed the data and wrote the manuscript. C.C. conceived the

247 project and supervised the study.

248

249 **Competing interests:** Authors declare no competing interests.

250

## Figure 1

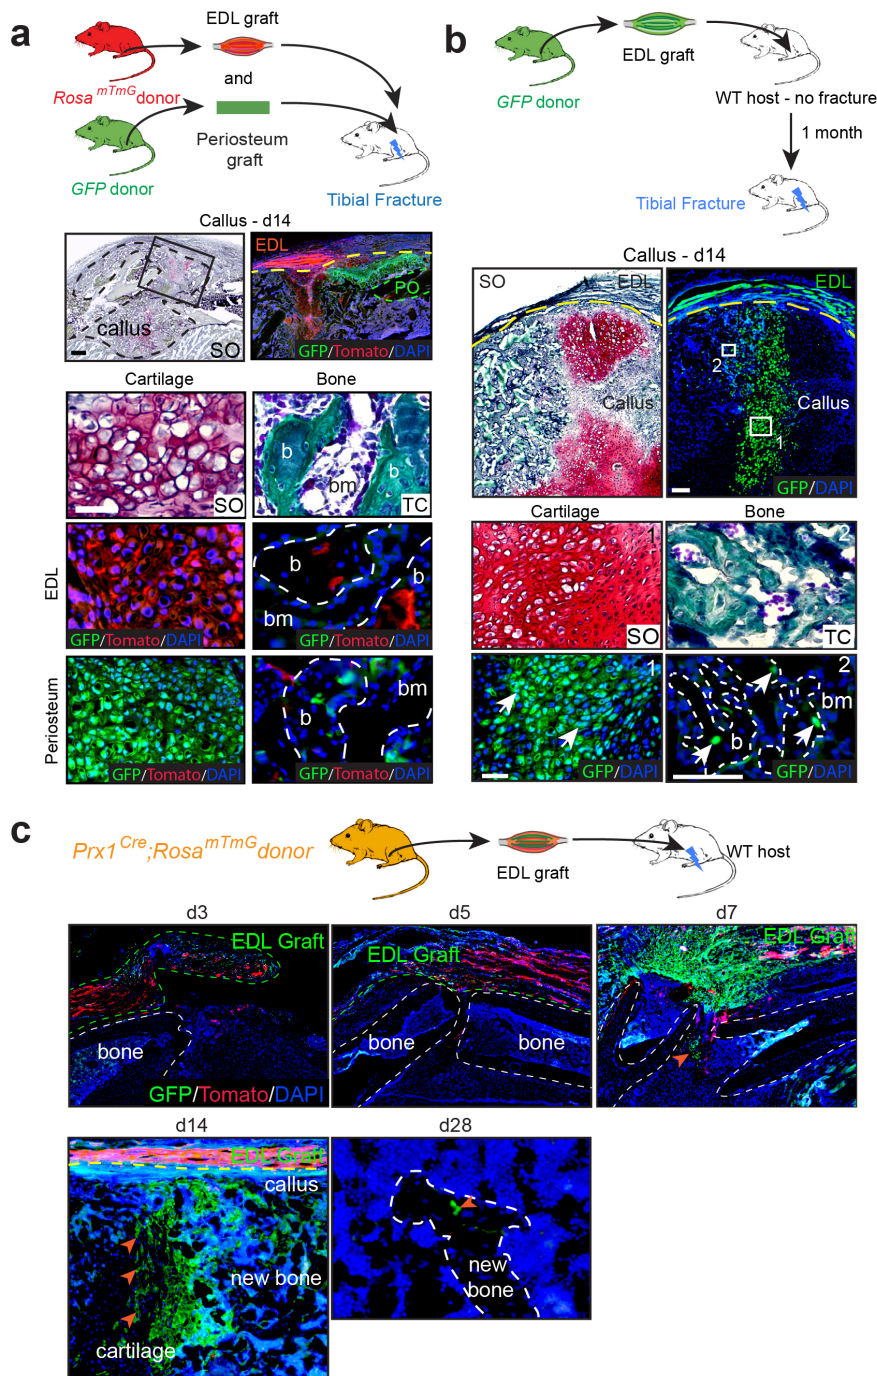

251

252 **Figure 1: Skeletal-muscle is a source of osteochondroprogenitors during bone repair**

253 **a**, Combined grafting of periosteum from *GFP-actin* mice and EDL-muscle from *mTmG* mice at the

254 fracture site of wild-type hosts. Longitudinal sections of tibial callus (delimited by a black dotted line)

255 at 14 days post-fracture and stained with Safranin-O (SO, left) and enlarged view of boxed region on

256 adjacent section counterstained with DAPI (right). EDL muscle graft outside the callus and skeletal  
257 muscle-derived cells within the callus (Tomato+ signal) (callus limited by a yellow dotted line).  
258 Periosteum graft (PO, delimited by a green dotted line) and periosteum-derived cells within the callus  
259 (GFP+ signal). High magnifications of cartilage and bone (b) derived from the EDL muscle graft<sup>31</sup> or  
260 from the periosteum graft (green) stained with SO and Masson's Trichrome (TC) and adjacent sections  
261 counterstained with DAPI (bone delimited by a white dotted line). **b**, Top: Experimental design of  
262 tibial fracture induced one month after GFP-EDL muscle graft transplantation. Middle: Callus sections  
263 of GFP-EDL muscle graft next to the fracture callus (delimited by a yellow dotted line) at d14 post-  
264 fracture stained with SO (left) and counterstained with DAPI (right). Bottom: High magnification of  
265 cartilage (box 1) and bone (box 2, white dotted line) containing GFP+ EDL muscle-derived  
266 chondrocytes and osteocytes respectively (white arrow). **c**, Experimental design of *Prx1<sup>Cre</sup>;Rosa<sup>mTmG</sup>*  
267 EDL muscle graft transplanted at the fracture site of wild-type hosts. Representative sections of  
268 fracture calluses at days 3, 5, 7, 14 and 28 post-fracture showing skeletal muscle derived cells in callus  
269 (orange arrowhead). Scale bar: SO/TC=1mm, high magnification= 50µm for cartilage and 25 µm for  
270 bone, bm: bone marrow. Representative images of 3 distinct samples.

271

272

## Figure 2

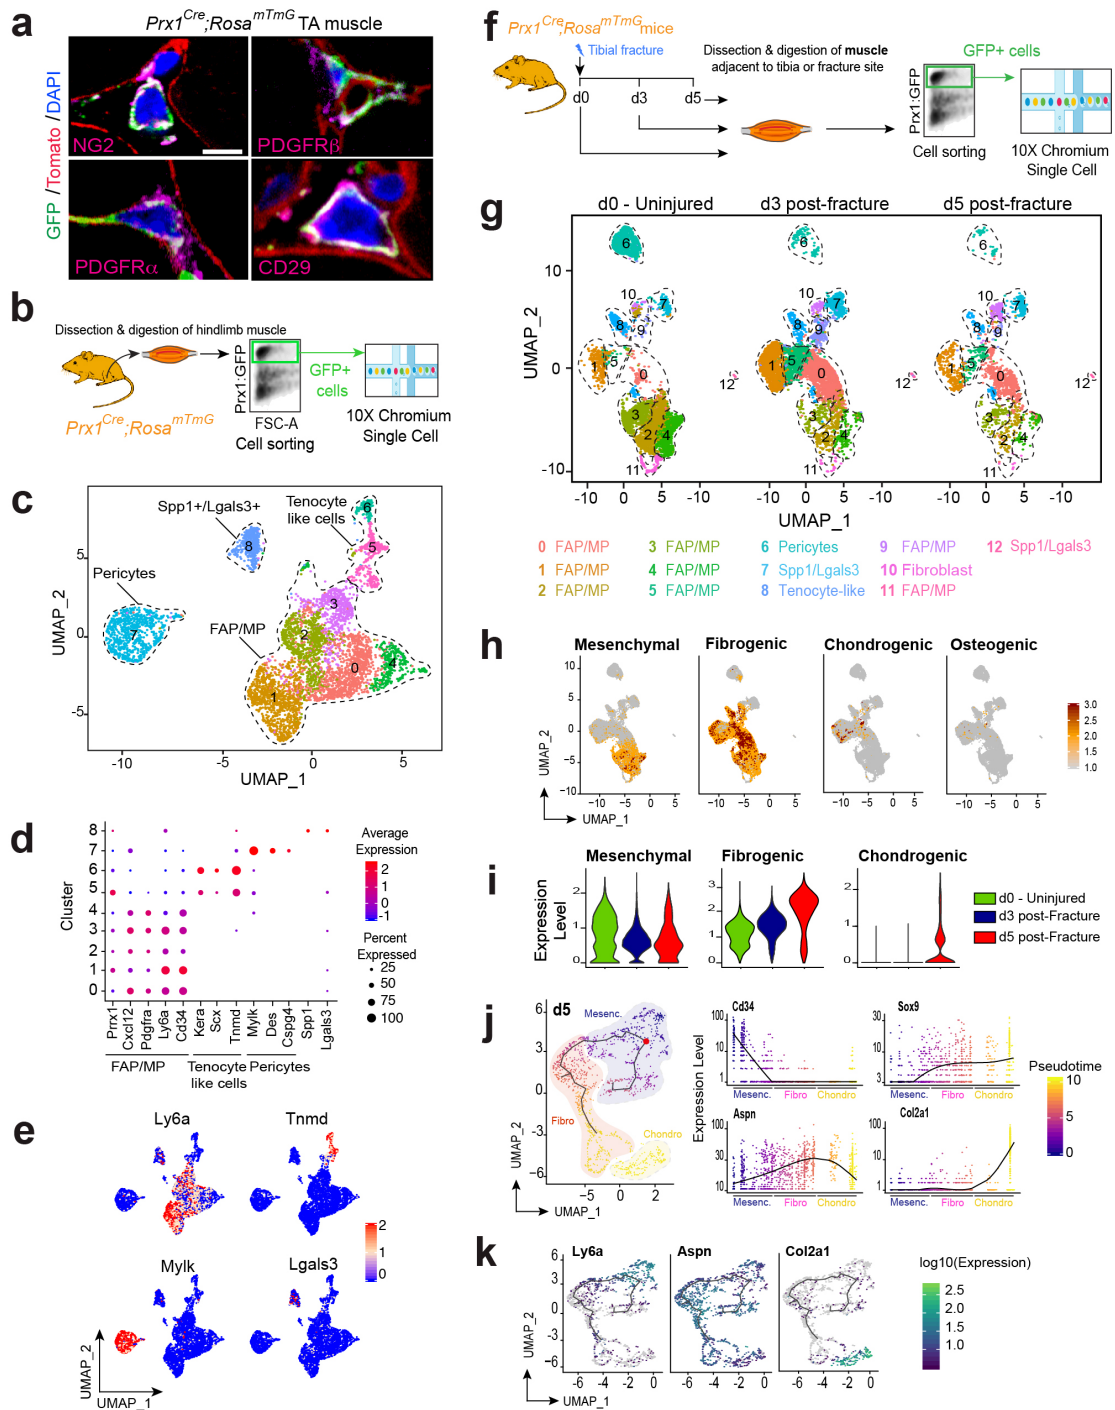

273

274 **Figure 2: Single cell RNAseq analyses of skeletal muscle mesenchymal progenitors in intact**  
 275 **muscle and in response to fracture**

276 **a**, Transverse sections of TA muscle from *Prx1<sup>Cre</sup>;Rosa<sup>mTmG</sup>* mice immunostained with NG2, PDGFR $\beta$ ,

277 PDGFR $\alpha$  or CD29 antibodies (magenta). DAPI labelled nuclei, GFP labelled Prx1-derived cells and

278 Tomato labelled non Prx1-derived cells. Representative images of 3 distinct samples. **b**, Experimental

279 design of scRNAseq experiment. Prx1-derived skeletal muscle cells were isolated from skeletal muscle

280 and sorted based on GFP-expression prior to scRNA-seq. **c**, UMAP projection of color-coded  
281 clustering of Prx1-derived cells reveals 9 clusters defining 4 distinct populations (limited by a black  
282 dotted line). **d**, Dotplot of indicated genes expression identifying FAP/MP, tenocyte-like cells,  
283 pericytes and Spp1/Lgals3+ cell populations. **e**, FeaturePlot of sub-population marker expression (*Ly6a*  
284 for FAP/MP, *Tnmd* for tenocyte like cells, *Mylk* for pericytes and *Lgals3* for Spp1+/Lgals3+ cells). **f**,  
285 Experimental design of single-cell analyses. Prx1-derived skeletal muscle cells were isolated from  
286 skeletal muscle at day 0, day 3 post-fracture and day 5 post-fracture and sorted based on GFP-  
287 expression prior to scRNA-seq. The 3 expression matrices were integrated to generate the dataset used  
288 for the analysis. **g**, UMAP projection of color-coded clustering of combined d0, d3 and d5 samples.  
289 Cluster identities are indicated below. **h**, FeaturePlot of mesenchymal, fibrogenic, chondrogenic and  
290 osteogenic lineages scores. **i**, Pseudobulk expression of mesenchymal, fibrogenic and chondrogenic  
291 score in d0, d3 and d5 post-fracture samples. **j**, Pseudotime analysis of FAP/MP at d5 post-fracture  
292 (left). Expression of *Ly6a*, *Aspn*, *Sox9* and *Col2a1* genes along pseudotime (right). **k**, FeaturePlot of  
293 *Ly6a*, *Aspn* and *Col2a1* expression as example of mesenchymal, fibrogenic, chondrogenic lineages in  
294 d5 post-fracture sample. Scale bars: a= 10 $\mu$ m.

295

296



## Figure 3

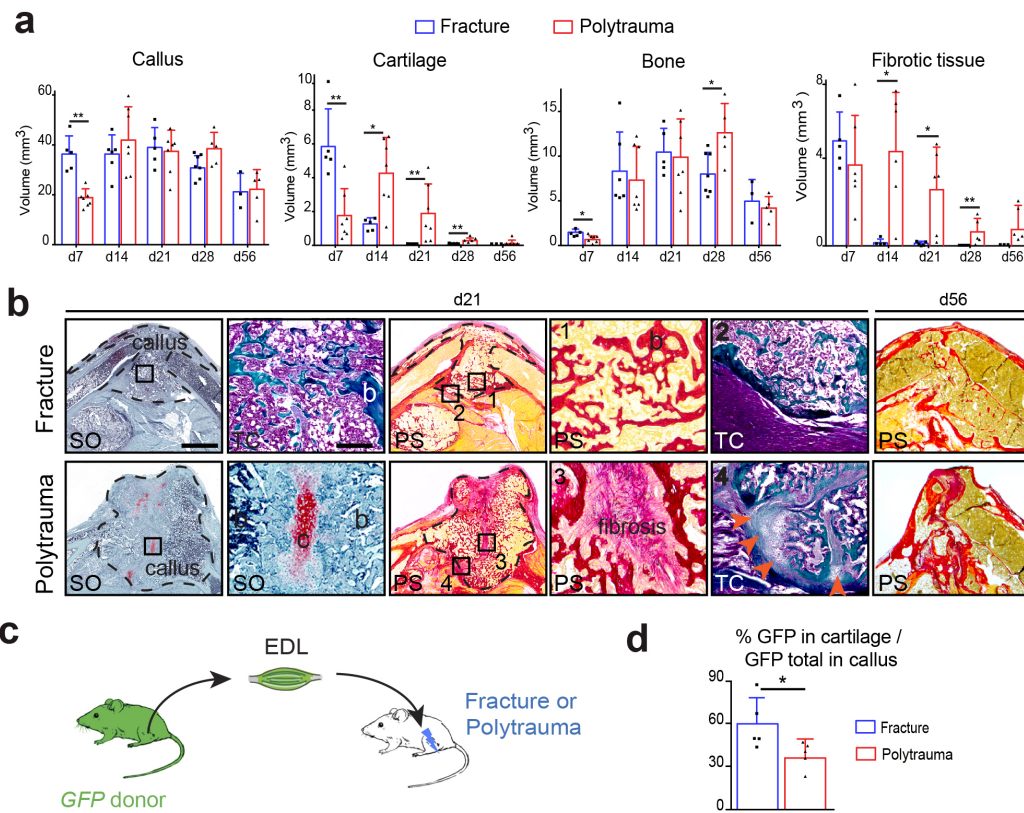

297

298 **Figure 3: Polytrauma severely impairs bone healing and cellular recruitment from skeletal**  
 299 **muscle**

300 **a**, Histomorphometric quantification of callus, cartilage, bone and fibrotic tissue volumes in tibial  
 301 fracture or in polytrauma through all stages of bone repair (d7 n=5 and n=7; d14, n=5 and n=7, d21 n=5  
 302 and n=7, d28 n=7 and n=5, d56 n=3 and n=5 for fracture and for polytrauma respectively). **b**,  
 303 Representative callus sections stained with Safranin-O (SO), Trichrome (TC) and PicroSirius (PS) at  
 304 days 21 and 56 (b: bone). Fully ossified callus and bone bridging in fracture (boxes 1, 2). Unresorbed  
 305 cartilage (c), fibrosis (box 3) and absence of bone bridging (box 4, orange arrowheads) in polytrauma.  
 306 Scale bars: low magnification = 1mm; boxed areas=200 $\mu$ m. **c**, Experimental design of EDL muscle  
 307 graft from *GFP-actin* mice transplanted at the fracture site of tibial fracture or polytrauma. **d**,  
 308 Histomorphometric analyses of GFP+ cartilage at day 14 post-injury. n=5 per group. Statistics: two-  
 309 tailed Mann-Whitney test, \*  $P < 0,05$ ; \*\*  $P < 0,01$ , all data represent mean  $\pm$  SD.

310

## Figure 4

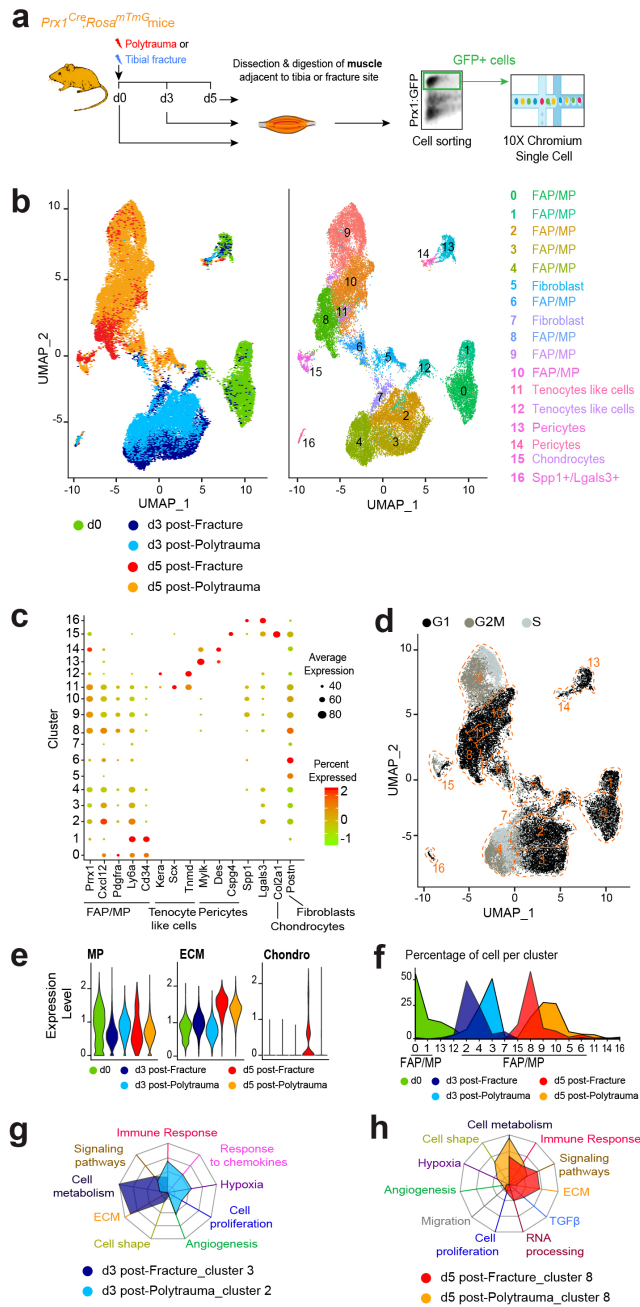

311

312 **Figure 4: Single-cell analyses of skeletal muscle mesenchymal progenitors reveal impairment of**  
 313 **initial fibrotic response in polytrauma**

314 **a**, Experimental design of scRNAseq experiment. *Prx1*-derived skeletal muscle cells were isolated at  
 315 d0, d3 and d5 post-fracture or post-polytrauma and sorted based on GFP-expression prior to scRNA-

316 seq. The 5 expression matrices were combined to generate the dataset used for the analysis. **b**, UMAP  
317 projection of color-coded sample (left) and clustering (right) of combined analysis of d0, d3 and d5  
318 post-fracture and post-polytrauma samples. Sample and cluster identities are indicated to the bottom  
319 and the right respectively. **c**, Dotplot of indicated genes expression identifying FAP/MP, tenocyte-like  
320 cells, pericyte, Spp1+/Lgals3+, chondrocyte and fibroblast cell populations. **d**, UMAP representation of  
321 color-coded cell cycle phases. **e**, Pseudobulk expression of mesenchymal, fibrogenic and chondrogenic  
322 score in d0, d3 and d5 post-fracture and post-polytrauma samples. **f**, Percentage of cell per cluster  
323 according to sample. **g**, Radar chart of enriched Gene Ontology functions in cluster 3 corresponding to  
324 d3 post-fracture and cluster 2 corresponding post-polytrauma. **h**, Radar chart of enriched Gene Ontology  
325 functions in d5 post-fracture *versus* post-polytrauma in cluster 8.

326

327

## Figure 5

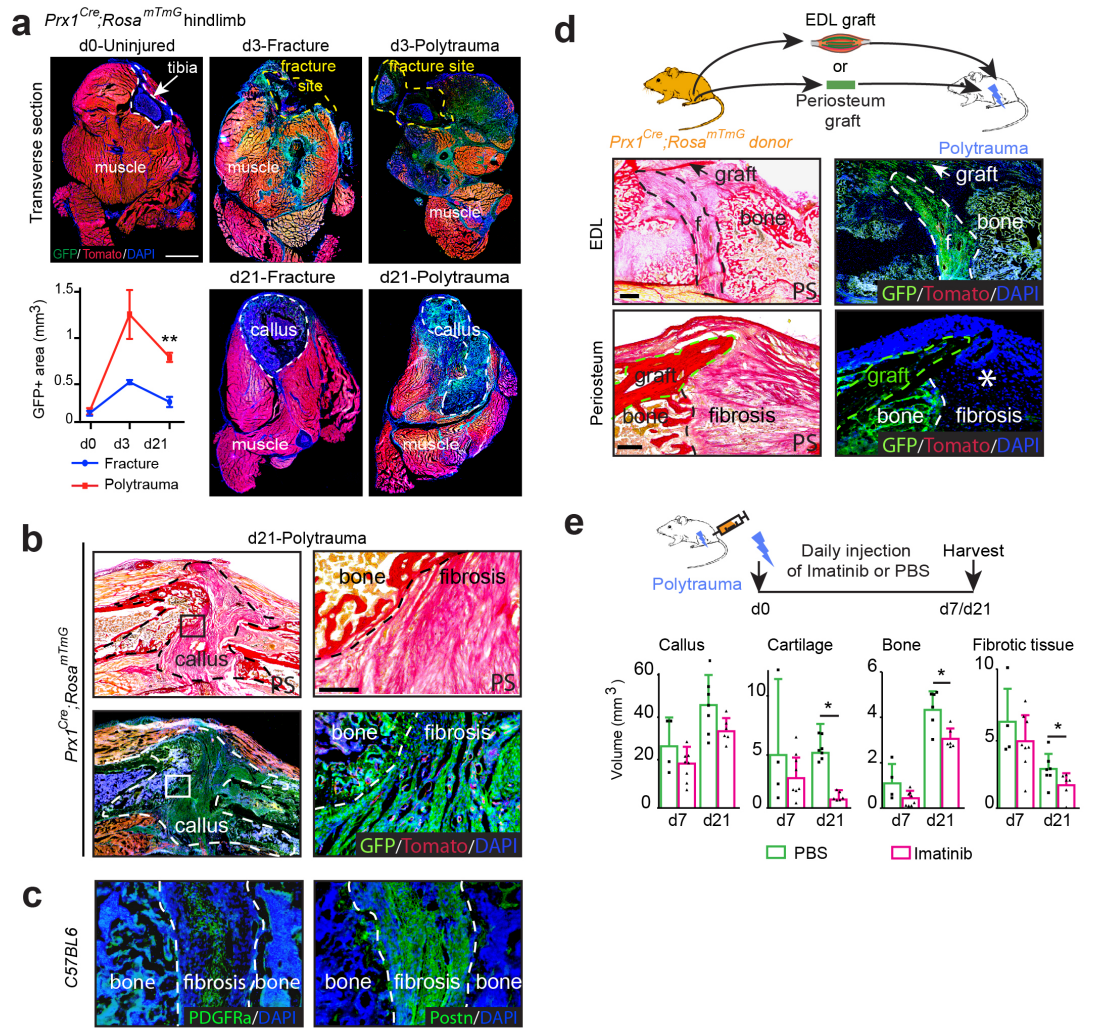

328

329 **Figure 5: Skeletal muscle mesenchymal progenitors are the source of persistent callus fibrosis in**  
 330 **polytrauma**

331 **a**, Transverse sections of hindlimb from *Prx1<sup>Cre</sup>;Rosa<sup>mTmG</sup>* mice at day 0, day 3 or d21 post-fracture or  
 332 post-polytrauma. Representative images of 3 distinct samples. Quantification of GFP+ area within  
 333 skeletal muscle (callus excluded) on transverse sections of hindlimb of *Prx1<sup>Cre</sup>;Rosa<sup>mTmG</sup>* mice at d0  
 334 (uninjured), d3 and d21 post-fracture and post-polytrauma (d0 n=4, d3 post-fracture n=3, d3 post-  
 335 polytrauma n=3, d21 post-fracture n=4 and d21 post-polytrauma n=3). T-test with Welch correction,  
 336 \*\*p<0.01 **b**, Longitudinal sections of fracture callus at day 21 post-polytrauma of *Prx1<sup>Cre</sup>;Rosa<sup>mTmG</sup>*  
 337 mice stained with Picrosirius (PS, top) or counterstained with DAPI (bottom), and high magnification  
 338 of boxed areas. **c**, Immunostaining of PDGFR $\alpha$  (green, left) and Periostin (green, right) in fibrosis of  
 339 *wild-type* callus. **d**, Experimental design of EDL muscle or periosteum graft from *Prx1<sup>Cre</sup>;Rosa<sup>mTmG</sup>*

340 mice transplanted at the fracture site in polytrauma (top). Longitudinal callus sections stained with PS  
341 and counterstained with DAPI at day 21 showed presence of GFP+ cells from EDL graft within bone  
342 and fibrosis and presence of GFP+ cells from periosteum graft within bone but absence within fibrosis  
343 (asterisk). e, Daily injection of Imatinib<sup>®</sup> (50mg/kg/day) or vehicle (PBS) in mice with polytrauma.  
344 Histomorphometric analyses of total callus, cartilage, bone and fibrosis volumes of treated vs control  
345 mice at days 7 or 21 (d7 PBS-treated n=4, d7 Imatinib-treated n=8, d21 PBS-treated n=7, d21 Imatinib-  
346 treated n=6), two-paired Mann-Whitney test, \**P*=0.05. A, B, C, D, Representative images of 3  
347 independent experiment. f: fibrosis. Scale bars: low magnification=1mm, high magnification=100μm.  
348 All data represent mean ± SD.

349

350

351

352 **METHODS**

353 Further information and requests for resources and reagents should be directed to and will be  
354 fulfilled by Colnot Céline (celine.colnot@inserm.fr)

355 **Mice**

356 C57BL/6ScNj, *beta-actinGFP* (*GFP*), *Prx1<sup>Cre</sup>*, *Pax7<sup>CreERT2</sup>*, *Rosa-tdTomato-EGFP* (*Rosa<sup>mTmG</sup>*) and  
357 *Rosa<sup>YFP</sup>* mice were obtained from Jackson Laboratory (Bar Harbor, ME) and maintained on a  
358 C57BL6/J background. Mice were bred and kept under controlled pathogen conditions in separated  
359 ventilated cages in the animal facility of Imagine Institute, Paris. All procedures were approved by the  
360 Paris Descartes University Ethical Committee. Animals used for all experiments were males or females  
361 10 to 14-week-old and experimental groups were homogeneous in terms of animal gender and age. No  
362 specific randomization methods were used. Sample labelling allowed blind analyses.

363

364 **Tamoxifen injection**

365 To induce Cre recombination, Tamoxifen (TMX, T5648, Sigma) was prepared at a concentration of  
366 10mg/mL diluted in corn oil, heated at 60°C for 2h and injected intraperitoneally (3 injections of  
367 300µL per injection). *Pax7<sup>CreERT2</sup>* mice were injected with Tamoxifen at days 7, 6 and 5 before fracture.

368

369 **Tibial fractures and Polytrauma**

370 For all surgical procedures, mice were anesthetized with an intraperitoneal injection of Ketamine  
371 (50mg/mL) and Metedomidine (1mg/kg) and received a subcutaneous injection of Buprenorphine  
372 (0.1mg/kg) for analgesia. The right leg was shaved and cleaned using Vetidine soap and solution (VET  
373 001, Vetoquinol). For tibial non-stabilized fracture, the tibial surface was exposed, three holes were  
374 drilled through the cortex using a 0.4mm drill bit in the mid-diaphysis and the bone was cut to create  
375 the fracture via osteotomy. For polytrauma, the skin was incised and skeletal muscles surrounding the  
376 tibia were separated from the bone. Mechanical injury to skeletal muscles, including *tibialis anterior*  
377 (*TA*), *tibialis posterior*, *extensor digitorum longus* (*EDL*), *soleus*, *plantaris*, *gastrocnemius* muscles  
378 surrounding the tibia, was applied by compressing the muscles for five seconds along their entire  
379 length using a hemostat in a standardized and reproducible procedure. Tibial fracture was then created  
380 in the mid-diaphysis by osteotomy as described above. For skeletal muscle injury only, the same  
381 procedure was applied without bone fracture. For partial skeletal muscle injury, the same procedure

382 was performed by compressing the TA and EDL skeletal muscles only prior to fracture. At the end of  
383 the procedure, skin was sutured using non-resorbable sutures (72-3318, Harvard Apparatus). Mice were  
384 revived with an intraperitoneal injection of atipamezole (1mg/mL), kept on heated plate and as soon as  
385 they were revived, they were allowed to ambulate freely. Mice received two supplementary doses of  
386 analgesia within 24h post-surgery and were monitored daily.

387

#### 388 **Imatinib treatment**

389 After polytrauma injury, mice received daily intraperitoneal injections of Imatinib® (50mg/kg/day,  
390 Selleckchem, STI571) or vehicle (PBS) from the day of fracture until sacrifice.

391

#### 392 **EDL skeletal muscle transplantation**

393 Host mice received either a fracture or a polytrauma injury as described above. Donor mice were  
394 sacrificed by cervical dislocation and EDL skeletal muscle was dissected from tendon to tendon. The  
395 EDL skeletal muscle was transplanted adjacent to the fracture site at the time of fracture. EDL  
396 proximal tendon was sutured to the host patellar tendon and distal tendon was sutured to the host  
397 peroneus muscle tendon using non-resorbable sutures (FST, 12051-08). Skin was then sutured as  
398 described above. When fracture was induced one month after EDL muscle grafting, EDL was first  
399 grafted as described above along the tibia without fracture. One month later, after skin incision, the  
400 tibial fracture was performed as described above via osteotomy after carefully separating the grafted  
401 EDL muscle and the bone.

#### 402 **Isolation of skeletal muscle cells and cell transplantation**

403 *Prx1<sup>Cre</sup>;Rosa<sup>mTmG</sup>* mice were sacrificed by cervical dislocation. Skin and fascia were removed. *Tibialis*  
404 *anterior* (TA), *extensor digitus lengus* (EDL), *plantaris* and *soleus* muscles surrounding the tibia were  
405 dissected from tendon to tendon avoiding periosteum or bone marrow cell contamination. In a petri  
406 dish with 1mL of DMEM medium (21063029, Invitrogen), tendon and fat were removed and skeletal  
407 muscles were cut in small pieces using scissors. Skeletal muscles were transferred in 3mL of digesting  
408 medium containing DMEM (21063029, Invitrogen), 1% Trypsin (210234, Roche), 1% collagenase D  
409 (11088866001, Roche) and incubated in a water bath at 37°C for 2 hours. Every 20 min individualised  
410 cells were removed and transferred into ice-cold growth medium containing  $\alpha$ MEM (32561029, Life

411 Technologies) with 1% penicillin-streptomycin (P/S, 15140122, Life Technologies), 20% lot-selected  
412 non-heat-inactivated foetal bovine serum (FBS, 10270106, Life Technologies) and 10ng/ml bFGF  
413 (3139-FB-025/CF, R&D) and digesting medium was changed. This step was repeated until all skeletal  
414 muscle was digested. Cells were then filtered through 100µm filters (352360, Dutscher) and 40µm  
415 filters (352340, Dutscher) and centrifuged 10min at 1500 rpm and resuspended in appropriated volume  
416 of growth medium.

417 For cell sorting, skeletal muscle cells were resuspended in 1mL of sorting medium containing DMEM  
418 medium (21063029, Invitrogen) with 2% of FBS and 1% of P/S. Cell viability marker Sytox blue  
419 (1/1000, S34857, Thermofischer) was added just before sorting. Cell sorting was performed on BD  
420 FACS Aria II SORP (BD Biosciences) and cells were collected in growth medium. 150 000 freshly  
421 sorted skeletal muscle cells were embedded in TissuCol® kit TISSEEL (human fibrogen 15mg/mL and  
422 thrombin 9mg/mL, Baxter, France) according to manufacturer's instructions. Open fracture was  
423 performed as described above and cell pellets were transplanted at the fracture site.

#### 424 **Callus sample processing, histology and histomorphometric analyses**

425 Mice were sacrificed by cervical dislocation and fractured tibias were harvested at days 3, 5, 7, 14, 21,  
426 28 or 56 post-surgery according to the experiment. Samples were fixed 24 hours in 4% PFA (15714,  
427 Euromedex) and decalcified in 19% EDTA (EU00084, Euromedex) for 21 days at 4°C upon agitation.  
428 Samples with endogenous expression of fluorescent reporters' proteins were incubated in sucrose 30%  
429 at 4°C over night and then embedded in OCT (F/62550-1, MMFrance). All others samples were  
430 embedded in paraffin. All samples were sectioned throughout the entire callus and consecutive sections  
431 were collected. Tissue sections from paraffin embedded samples were incubated in NeoClear®  
432 (1098435000, VWR) for 2x5min and rehydrated in successive baths of 100%, 90% and 70% ethanol  
433 and then rinsed in PBS for 5min. Frozen sections were let dry at room temperature for 30min and  
434 rehydrated in PBS for 10min. After staining, sections were dehydrated in 70%, 90%, 100% ethanol for  
435 3min each and NeoClear® for 10min. Slides were mounted using NeoMount® mounting medium  
436 (1090160100, VWR).

437 *Safranin'o staining.* Nucleus were stained with Weigert's solution of 5min. Slides were next rinsed  
438 with tap running water for 3min and then stained into 0.02% Fast Green for 30s (F7252, Sigma),  
439 followed by 30s into 1% acetic acid. To detect proteoglycan's within cartilage, slides were stained with  
440 safranin'o solution for 45min (S2255, Sigma).



441 *Masson's trichrome staining.* Sections were stained with Harris haematoxylin (dilution  $\frac{1}{2}$ ) for 5min  
442 (F/C0283, MMFrance), rinsed in running tap water 5min, then dyed with Mallory red for 10min, rinsed  
443 for 5min and then differentiated into phosphomolybdic acid 1% for 10min (HT153, Sigma). Collagen  
444 in bone was stained with light green for 20min (720-0335, VWR) and fixed into acetic acid 1%.

445 *Picrosirius staining.* Sections were stained in PicroSirius solution for 2h at room temperature, protected  
446 from light.

447 For histomorphometric analyses, every thirtieth section throughout the entire callus was stained with  
448 Safranin'o (SO), modified Massons' Trichrome (TC), Picrosirius (PS) or counterstained with DAPI to  
449 visualize GFP signal and pictured using a Zeiss Imager D1 AX10 light microscope. Areas of callus,  
450 cartilage, bone, fibrosis and GFP signal were determined using ZEN software (Carl Zeiss Microscopy  
451 GmbH) and volumes were calculated via the following formula:  $Volume = \frac{1}{3} h \sum_{i=1}^{n-1} A_i + A(i +$   
452  $1) + \sqrt{A_i * A(i + 1)})$  where  $A_i$  and  $A_{i+1}$  were the areas of callus, cartilage, bone, fibrosis or GFP  
453 signal in sequential sections,  $h$  was the distance between  $A_i$  and  $A_{i+1}$  and equal to 300  $\mu$ m,  $n$  was the  
454 total number of sections analyzed in the sample.

455

#### 456 **Skeletal muscle sample processing and analyses**

457 *Tibialis anterior (TA)* skeletal muscle samples were harvested at specific time points, fixed for 3 hours  
458 in PFA 4%, incubated in sucrose 30% for 2 hours and embedded in OCT for cryosection. Sections were  
459 collected in the center of the muscle.

460 *Haematoxylin-Eosin staining.* Slides were stained with hemalun for 3min, rinsed in running tap water  
461 for 1min, stained with eosin for 1min (6766009, Thermo Fischer Scientific), then rinsed in water and  
462 pictured using a Zeiss Imager D1 AX10 light microscope.

463

#### 464 **GFP quantification within skeletal muscle surrounding fracture callus**

465 Tibial samples from *Prx1<sup>Cre</sup>;Rosa<sup>mTmG</sup>* mice were processed as described above for cryosection and  
466 were transversally included in OCT. Every fifth transverse section was collected in the middle of the  
467 diaphysis of uninjured tibia, at the fracture site day 3 post-fracture or in the center of the callus at day  
468 21 post-fracture. Sections were counterstained with DAPI (eBiosciences, 495952) to allow GFP  
469 visualization. Entire transverse sections were pictured using Spinning Disk (Zeiss) and GFP signal was

470 quantified within skeletal muscle excluding callus area using ZEN software (Carl Zeiss Microscopy  
471 GmbH).

472

### 473 **Immunofluorescence**

474 GFP signal was detected without immunofluorescence staining. Cryosections were dried at room  
475 temperature for 30min, rehydrated in PBS for 10min and then mounted with Fluoromount  
476 (eBiosciences, 495952)<sup>3</sup>.

477 For calluses samples, paraffin embedded sections were deparaffinized and rehydrated as described  
478 above. For Periostin immunofluorescence, sections were blocked in 5% donkey serum for 1h and  
479 incubated in goat anti-periostin antibody (1/400, ref AF2955 R&D) diluted in 5% donkey serum in  
480 PBS (D9663, Sigma) over-night at 4°C. Sections were then washed in PBS 3x5min, incubated with  
481 donkey anti-goat AF488 antibody (1/250, A11055, Invitrogen) diluted in 5% donkey serum then rinsed  
482 with PBS for 10min and mounted using Fluoromount. For PDGFR $\alpha$  immunofluorescence, antigen  
483 retrieval were performed using sodium citrate buffer at 95°C for 20min. Slides were then cooled down  
484 in sodium citrate buffer on ice for 20min, rinsed in PBS 2x10min and then incubated in blocking  
485 solution containing 5% normal goat serum (NGS, Ab7481, Abcam), 0.5% Triton (T8787, Sigma) in  
486 PBS for 1h. Sections were washed in PBS 3x5min and incubated with goat anti-PDGFR $\alpha$  antibody  
487 (1/200, ref AF1062 R&D) diluted in blocking solution over-night at 4°C. Sections were then washed in  
488 PBS 3x5min, incubated with donkey anti-goat AF488 antibody (1/250, A11055, Invitrogen) diluted in  
489 blocking buffer then rinsed with PBS for 10min and mounted using Fluoromount. Samples were  
490 pictured using a Zeiss Imager D1 AX10 light microscope.

491 For skeletal muscle samples, cryosections were dried 30min at room temperature protected from light  
492 and then rehydrated for 10 min PBS. For anti-NG2, anti-PDGFR $\alpha$  and anti-PDGFR $\beta$   
493 immunofluorescence, muscle cryosections were post-fixed in PFA 4% for 5min, rinsed 3x5min in 0.5%  
494 Triton in PBS, blocked in 5% NGS and 0.5% Triton diluted in PBS and incubated over night at 4°C  
495 with primary antibody: rabbit anti-NG2 (1/50, AB5320, Merck), goat anti-PDGFR $\alpha$  (1/200, AF1062,  
496 R&D) or rabbit anti- PDGFR $\beta$  (1/200, ab32570, Abcam). Slides were rinsed in PBS 3x5min and then  
497 incubated for 1h at room temperature in goat anti-rabbit AF647 (1/250, 21245, Life Technologies) or  
498 donkey anti-goat AF647 (1/500, ref ab150135 Abcam). Slides were mounted with Fluoromount (ref  
499 495952, eBiosciences). For anti-CD29 immunofluorescence, cryosections were post-fixed in PFA 4%

500 for 10min, washed for 2x5min in PBS, permeabilized in PBS-Triton 0.25%, blocked in 1% BSA for  
501 15min (A2153, Sigma) and incubated with goat anti-mouse CD29 (1/50, 026202, R&D) overnight at  
502 4°C. Slides were next rinsed and incubated in donkey anti-goat AF647 (1/500, ab150135, Abcam).  
503 Slides were mounted with Fluoromount. All pictures were obtained using a LSM700 confocal  
504 microscope (Zeiss).

505 For anti- $\alpha$ SMA immunocytofluorescence, cells were washed with PBS and fixed in PFA 4% for 15min,  
506 rinsed in PBS, permeabilized in PBS-Triton 0.25%, blocked in 5% NGS, incubated with anti- $\alpha$ SMA-  
507 Cy5 (ref AC12-0159-11, Clinisciences) for 1 hour and mounted with Fluoromount. Pictures were taken  
508 using a Zeiss Axio Vertical A1 light microscope.

509

#### 510 **Flow cytometry**

511 For flow cytometry analysis, skeletal muscle cells were incubated with CD31-PECy7 (PECAM-1,  
512 561410, BD Biosciences), CD45-PECy7 (leukocyte common antigen, Ly-5, 552848, BD Biosciences),  
513 CD11b-PECy7 (integrin  $\alpha$ M chain, 552850, BD Biosciences), CD34-AF700 (560518 BD Biosciences),  
514 Sca1-BV650 (740450, BD Biosciences), CD29-APC (130-096-306, Miltenyi Biotec), PDGFR $\alpha$ -BV711  
515 (740740, BD Biosciences) and PDGFR $\beta$ -APC (17-1402-80, Invitrogen) for 15min on ice protected  
516 from light. Cells were then washed by adding 1mL of sorting medium and centrifuged for 10min at  
517 1500rpm. Supernatant was trashed and cell pellets were resuspended in 200 $\mu$ L of sorting medium and  
518 Sytox blue was added just before analysis. Beads (01-2222-42, Thermo Fischer) were used for initial  
519 compensation set up and FMO controls were used to determine background level of each colour.  
520 Analyses were performed on BD LSR Fortessa SORP (BD Biosciences) and results analysed using  
521 FlowJo, LLC software, version 10.2. Gating strategy used for analyses is available in Extended Data  
522 Figure 4a.

523

#### 524 ***In vitro* differentiation**

525 After cell sorting, Prx1-derived skeletal muscle cells were expanded in 6-well plate to allow *in vitro*  
526 differentiation.

527 For adipogenic differentiation, sub confluent cells were placed into adipogenic medium containing  
528  $\alpha$ MEM supplemented with 10% FBS, 0.1 $\mu$ g/ml insulin (I3536, Sigma), 100 $\mu$ M indomethacin (I7378,  
529 Sigma), 0.5mM 3-isobutyl-1-methylxantine (I5879, Sigma) and 0.1 $\mu$ M dexamethasone (D8893,

530 Sigma). Medium was changed every three days for two weeks. Lipid droplets were stained with Oil  
531 Red O solution (O0625, Sigma) and nucleus with Harris haematoxylin solution (F/C0283, MMFrance).  
532 For osteogenic differentiation, cells at confluence were cultured in osteogenic medium containing  
533  $\alpha$ MEM supplemented with 10% FBS, 0.1 $\mu$ M dexamethasone, 0.2mM L-ascorbic acid (A8960, Sigma)  
534 and 10mM glycerol 2-phosphate disodium salt hydrate (G9422, Sigma). Medium was changed every  
535 three days for three weeks. Mineralization was revealed with 0.2% alizarin red staining (A5533,  
536 Sigma). For chondrogenic differentiation, cells were plated as micromass at a concentration of  $5 \cdot 10^5$   
537 cells in 200 $\mu$ L of growth media. Two hours later, growth medium was replaced by chondrogenic  
538 medium corresponding to DMEM with 10% FBS with 0.1 $\mu$ M dexamethasone, 100 $\mu$ g/mL sodium  
539 pyruvate (P5280, Sigma), 40 $\mu$ g/mL L-proline (P0380, Sigma), 50 $\mu$ g/mL L-ascorbic acid, 50mg/mL  
540 Insulin-Serine-Transferase (I1884, Sigma) and 10ng/mL TGF $\beta$ 1 (T7039, Sigma). Medium was  
541 changed every three days for two weeks and proteoglycans were stained with alcian blue (A5268,  
542 Sigma). For myogenic differentiation, Prx1-derived muscle cells were plated at 1000 cells per cm<sup>2</sup> and  
543 induced with myogenic medium containing F10 (31550-02, Life Technologies), 2% horse serum  
544 (26050088, Life Technologies) and 1% P/S for 3 days. For fibrogenic differentiation, cells were grown  
545 until sub-confluence and induced to fibrogenic differentiation with DMEM high-glucose (10566016,  
546 Life Technologies) with 10% FBS, 1% P/S and TGF- $\beta$ 1 at 1ng/mL. All pictures were obtained with a  
547 Leica DM IRB light microscope.

548

#### 549 **RTqPCR analyses**

550 Prx1-derived skeletal muscle cells at 80% of confluence were dissociated using trypsin, pelleted for 10  
551 min at 1500 rpm and frozen at -80°C. RNA extraction was performed with RNAeasy Kit (74134,  
552 Qiagen) following manufacture's instructions. Amount of RNA was quantified using NanoDrop 2000  
553 UV-Vis Spectrophotometer (Thermo Scientific). 500 $\mu$ g of RNA were used to synthesize cDNA. RNAs  
554 were mixed with 1 $\mu$ L of oligo<sub>12-18</sub> (18418-012, Life Technologies) and 1 $\mu$ L 10mM dNTP Mix (18427-  
555 013, Life Technologies) and heated at 65°C for 5min and left on ice for 1min. Next, 4 $\mu$ L 5X First-  
556 Strand buffer, 1 $\mu$ L 0.1M DTT, 1 $\mu$ L Superscript III RT® (18080-044, Life Technologies) and 1 $\mu$ L  
557 RNaseOUT® (10777-019, Life Technologies) were added and incubated at 50°C for 1h. The reaction  
558 was inactivated by heating at 70°C for 15min. qPCR mix was composed by 1 $\mu$ L of primers, 4 $\mu$ L of  
559 RNase free H<sub>2</sub>O, 10 $\mu$ L of SYBR green Master Mix (11744-100, Life Technologies) and 5 $\mu$ L of

560 cDNA. qPCR reaction was performed using 7300 Real-Time PCR System (Thermofischer Scientific).

561 Mouse *Gapdh* was used as internal calibrator. qPCR analysis was done following  $\Delta\Delta CT$  methods.

## 562 **Single cell analyses**

563 Prx1-derived skeletal muscle cells were isolated as described above from *Prx1<sup>Cre</sup>;Rosa<sup>mTmG</sup>* d0 mice  
564 (un-injured), at day 3 post-fracture, day 3 post-polytrauma, day 5 post-fracture or day 5 post-  
565 polytrauma. Two mice were used per sample and only skeletal muscle was dissecting. Periosteum and  
566 bone marrow were not taken during the dissection. The scRNA-seq libraries were generated using  
567 Chromium Single Cell 3'Library & Gel Bead Kit v.2 (10x Genomics) according to the manufacturer's  
568 protocol. Briefly, cells were counted, diluted at 1000 cells/ $\mu$ L in PBS+0,04% FBS and 20 000 cells  
569 were loaded in the 10x Chromium Controller to generate single-cell gel-beads in emulsion. After  
570 reverse transcription, gel-beads in emulsion were disrupted. Barcoded complementary DNA was  
571 isolated and amplified by PCR. Following fragmentation, end repair and A-tailing, sample indexes  
572 were added during index PCR. The purified libraries were sequenced on a HiSeq 2500 (Illumina) with  
573 26 cycles of read 1, 8 cycles of i7 index and 98 cycles of read 2.

## 574 *Aggregate sample generation*

575 We generated aggregate sample to compared d0, d3 post-fracture, d5 post-fracture, d3 post-polytrauma  
576 and d5 post-polytrauma in a common dataset. Aggregate sample was generated according to cell ranger  
577 aggr pipeline in order to remove batch effect due to sequencing depth.

## 578 *Seurat analysis*

579 Seurat v3.1.2 and Rstudio v1.2.1335 were used for analysis of scRNA-seq data<sup>32,33</sup>. Cells expressing  
580 between 350 and 8000 genes and expressing less that 20% of mitochondrial gene were retained for  
581 analysis, genes expressed in less than 5 cells were not taken into account. Clustering was performed  
582 using the first 20 principal components with 0.5 as resolution and clusters were visualized using  
583 UMAP projection. Integrated analysis of d0, d3 and d5 post-fracture was performed using top 2000  
584 features and the 20 first principal components with a resolution set at 0.5. Differentially expressed  
585 genes were determined using Wilcoxon rank sum test with P-value<0.05. For Gene Ontology (GO)  
586 analyses, differentially expressed genes were used to find enriched functions using Enrich R software  
587 (<https://amp.pharm.mssm.edu/Enrichr/>)<sup>34,35</sup>. GO functions including less than 5 genes and with  
588 adjusted adjusted P-value>0.05 were excluded. GO functions were classified into global functions and

589 the percentage each function across all the functions found was plotted into radar graph as represented  
590 in the figure.

#### 591 *Monocle analysis*

592 Monocle3 v0.2 was used for pseudotime analysis on FAP/MP of d5 post-fracture cells. Cells were  
593 ordered in a semi-supervised manner on the basis of Seurat clustering. Starting points correspond to the  
594 highest expression of *Ly6a* and *Cd34* genes.

#### 595 *Cell cycle analysis*

596 Cell cycle analysis was performed using Cell Cycle Regression vignette from Seurat package.

#### 597 *Lineage analysis*

598 Signature score was calculated for each cell as arithmetic mean of the expression of the associated  
599 genes in each cell (Table 1), and implemented as metadata in Seurat object.

#### 600 **Statistical analyses**

601 Data are presented as mean  $\pm$  s.d. and were obtained from at least two independent experiments and n  
602 represents the number of samples used for the analysis. Statistical significance was determined with  
603 two-sided Mann-Whitney test and reported in GraphPad Prism v6.0a. Differences were considered to  
604 be significant when  $P < 0.05$ .

605

606 **References**

607

- 608 1. Colnot, C. Skeletal cell fate decisions within periosteum and bone marrow during bone  
609 regeneration. *J Bone Miner Res* **24**, 274-282 (2009).
- 610 2. Debnath, S. *et al.* Discovery of a periosteal stem cell mediating intramembranous bone  
611 formation. *Nature* **562**, 133-139 (2018).
- 612 3. Duchamp de Lageneste, O. *et al.* Periosteum contains skeletal stem cells with high bone  
613 regenerative potential controlled by Periostin. *Nat Commun* **9**, 773 (2018).
- 614 4. van Gestel, N. *et al.* Engineering vascularized bone: osteogenic and proangiogenic potential of  
615 murine periosteal cells. *Stem Cells* **30**, 2460-2471 (2012).
- 616 5. Zhang, X. *et al.* Periosteal progenitor cell fate in segmental cortical bone graft  
617 transplantations: implications for functional tissue engineering. *J Bone Miner Res* **20**, 2124-  
618 2137 (2005).
- 619 6. Abou-Khalil, R. *et al.* Role of muscle stem cells during skeletal regeneration. *Stem Cells* **33**,  
620 1501-1511 (2015).
- 621 7. Glass, G.E. *et al.* TNF-alpha promotes fracture repair by augmenting the recruitment and  
622 differentiation of muscle-derived stromal cells. *Proc Natl Acad Sci U S A* **108**, 1585-1590  
623 (2011).
- 624 8. Harry, L.E. *et al.* Comparison of the healing of open tibial fractures covered with either  
625 muscle or fasciocutaneous tissue in a murine model. *J Orthop Res* **26**, 1238-1244 (2008).
- 626 9. Liu, R. *et al.* Myogenic progenitors contribute to open but not closed fracture repair. *BMC*  
627 *Musculoskelet Disord* **12**, 288 (2011).
- 628 10. Urist, M.R. Bone: formation by autoinduction. *Science* **150**, 893-899 (1965).
- 629 11. Cairns, D.M. *et al.* Interplay of Nkx3.2, Sox9 and Pax3 regulates chondrogenic differentiation  
630 of muscle progenitor cells. *PLoS One* **7**, e39642 (2012).
- 631 12. Joe, A.W. *et al.* Muscle injury activates resident fibro/adipogenic progenitors that facilitate  
632 myogenesis. *Nat Cell Biol* **12**, 153-163 (2010).
- 633 13. Lemos, D.R. & Duffield, J.S. Tissue-resident mesenchymal stromal cells: Implications for  
634 tissue-specific antifibrotic therapies. *Sci Transl Med* **10** (2018).
- 635 14. Uezumi, A. *et al.* Fibrosis and adipogenesis originate from a common mesenchymal  
636 progenitor in skeletal muscle. *J Cell Sci* **124**, 3654-3664 (2011).
- 637 15. Malecova, B. *et al.* Dynamics of cellular states of fibro-adipogenic progenitors during  
638 myogenesis and muscular dystrophy. *Nat Commun* **9**, 3670 (2018).
- 639 16. Scott, R.W., Arostegui, M., Schweitzer, R., Rossi, F.M.V. & Underhill, T.M. Hic1 Defines  
640 Quiescent Mesenchymal Progenitor Subpopulations with Distinct Functions and Fates in  
641 Skeletal Muscle Regeneration. *Cell Stem Cell* **25**, 797-813 e799 (2019).
- 642 17. Byrd, H.S., Cierny, G., 3rd & Tebbetts, J.B. The management of open tibial fractures with  
643 associated soft-tissue loss: external pin fixation with early flap coverage. *Plast Reconstr Surg*  
644 **68**, 73-82 (1981).
- 645 18. Richards, R.R., McKee, M.D., Paitich, C.B., Anderson, G.I. & Bertoia, J.T. A comparison of  
646 the effects of skin coverage and muscle flap coverage on the early strength of union at the site  
647 of osteotomy after devascularization of a segment of canine tibia. *J Bone Joint Surg Am* **73**,  
648 1323-1330 (1991).
- 649 19. Willett, K., Al-Khateeb, H., Kotnis, R., Bouamra, O. & Lecky, F. Risk of mortality: the  
650 relationship with associated injuries and fracture treatment methods in patients with unilateral  
651 or bilateral femoral shaft fractures. *J Trauma* **69**, 405-410 (2010).
- 652 20. Chan, J.K., Harry, L., Williams, G. & Nanchahal, J. Soft-tissue reconstruction of open  
653 fractures of the lower limb: muscle versus fasciocutaneous flaps. *Plast Reconstr Surg* **130**,  
654 284e-295e (2012).
- 655 21. Huang, P., Zhao, X.S., Fields, M., Ransohoff, R.M. & Zhou, L. Imatinib attenuates skeletal  
656 muscle dystrophy in mdx mice. *FASEB J* **23**, 2539-2548 (2009).
- 657 22. Ito, T. *et al.* Imatinib attenuates severe mouse dystrophy and inhibits proliferation and  
658 fibrosis-marker expression in muscle mesenchymal progenitors. *Neuromuscul Disord* **23**, 349-  
659 356 (2013).
- 660 23. Sacchetti, B. *et al.* No Identical "Mesenchymal Stem Cells" at Different Times and Sites:  
661 Human Committed Progenitors of Distinct Origin and Differentiation Potential Are  
662 Incorporated as Adventitial Cells in Microvessels. *Stem Cell Reports* **6**, 897-913 (2016).
- 663 24. Wosczyzna, M.N. *et al.* Mesenchymal Stromal Cells Are Required for Regeneration and  
664 Homeostatic Maintenance of Skeletal Muscle. *Cell Rep* **27**, 2029-2035 e2025 (2019).

- 665 25. Giordani, L. *et al.* High-Dimensional Single-Cell Cartography Reveals Novel Skeletal  
666 Muscle-Resident Cell Populations. *Mol Cell* **74**, 609-621 e606 (2019).
- 667 26. Di Carlo, S.E. & Peduto, L. The perivascular origin of pathological fibroblasts. *J Clin Invest*  
668 **128**, 54-63 (2018).
- 669 27. Judson, R.N., Zhang, R.H. & Rossi, F.M. Tissue-resident mesenchymal stem/progenitor cells  
670 in skeletal muscle: collaborators or saboteurs? *FEBS J* **280**, 4100-4108 (2013).
- 671 28. Kanisicak, O. *et al.* Genetic lineage tracing defines myofibroblast origin and function in the  
672 injured heart. *Nat Commun* **7**, 12260 (2016).
- 673 29. Rinkevich, Y. *et al.* Skin fibrosis. Identification and isolation of a dermal lineage with  
674 intrinsic fibrogenic potential. *Science* **348**, aaa2151 (2015).
- 675 30. Harvey, T., Flamenco, S. & Fan, C.M. A Tpp3(+)/Pdgfra(+) tendon stem cell population  
676 contributes to regeneration and reveals a shared role for PDGF signalling in regeneration and  
677 fibrosis. *Nat Cell Biol* **21**, 1490-1503 (2019).
- 678 31. Heredia, J.E. *et al.* Type 2 innate signals stimulate fibro/adipogenic progenitors to facilitate  
679 muscle regeneration. *Cell* **153**, 376-388 (2013).
- 680 32. Butler, A., Hoffman, P., Smibert, P., Papalexi, E. & Satija, R. Integrating single-cell  
681 transcriptomic data across different conditions, technologies, and species. *Nat Biotechnol* **36**,  
682 411-420 (2018).
- 683 33. Stuart, T. *et al.* Comprehensive Integration of Single-Cell Data. *Cell* **177**, 1888-1902 e1821  
684 (2019).
- 685 34. Chen, E.Y. *et al.* Enrichr: interactive and collaborative HTML5 gene list enrichment analysis  
686 tool. *BMC Bioinformatics* **14**, 128 (2013).
- 687 35. Kuleshov, M.V. *et al.* Enrichr: a comprehensive gene set enrichment analysis web server 2016  
688 update. *Nucleic Acids Res* **44**, W90-97 (2016).
- 689
- 690
